# Supplementary material
Source: HighWire-hosted journal article supplement (https://bmjopen.bmj.com/content/9/4/e025850)
Supplement: inline-supplementary-material-1 [file inline-supplementary-material-1.pdf]

#### CENTRAL search strategy

#1 MeSH descriptor: [Dexmedetomidine] explode all trees

#2 (dexmedetomidine or precede):ti,ab,kw

#3 #1 or #2

#4 MeSH descriptor: [Delirium] explode all trees

#5 (deliri\* or “acute confusion\*” or “acute organic psychosyndrome” or “acute brain syndrome” or “metabolic encephalopathy” or “acute psycho-organic syndrome” or “clouded state” or “clouding of consciousness” or “exogenous psychosis” or “toxic psychosis” or “toxic confusion” or obnubilat\*):ti,ab,kw

#6 #4 or #5

#7 #3 and #6

#### Pubmed search strategy

#1 “Dexmedetomidine”[Mesh]

#2 (dexmedetomidine or precede)[Title/Abstract]

#3 #1 or #2

#4 “Delirium”[Mesh]

#5 (deliri\* or “acute confusion\*” or “acute organic psychosyndrome” or “acute brain syndrome” or “metabolic encephalopathy” or “acute psycho-organic syndrome” or “clouded state” or “clouding of consciousness” or “exogenous psychosis” or “toxic psychosis” or “toxic confusion” or obnubilat\*)[Title/Abstract]

#6 #4 or #5

#7 (randomized controlled trial or controlled clinical trial)[Publication Type] or (random\* or placebo or trial\* or blind\* or multicenter\* or prospective)[Title/Abstract]

#8 #3 and #6 and #7

#### Embase search strategy

#1 'dexmedetomidine'/exp

#2 ('dexmedetomidine' or 'precede'):ab,ti

#3 #1 or #2

#4 'delirium'/exp

#5 ('deliri\*' or 'acute confusion\*' or 'acute organic psychosyndrome' or 'acute brain syndrome' or 'metabolic encephalopathy' or 'acute psycho-organic syndrome' or 'clouded state' or 'clouding of consciousness' or 'exogenous psychosis' or 'toxic psychosis' or 'toxic confusion' or 'obnubilat\*'):ab,ti

#6 #4 or #5

#7 ('random\*' or 'placebo' or 'trial\*' or 'blind\*' or 'multicenter\*' or 'prospective'):ab,ti

#8 #3 and #6 and #7

#### ISI Web of Science search strategy

#1 TS=(dexmedetomidine or precede)

#2 TS=(deliri\* or “acute confusion\*” or “acute organic psychosyndrome” or “acute brain syndrome” or “metabolic encephalopathy” or “acute psycho-organic syndrome” or “clouded state” or “clouding of consciousness” or “exogenous psychosis” or “toxic psychosis” or “toxic confusion” or obnubilat\*)

#3 TS=(random\* or placebo or trial\* or blind\* or multicenter\* or prospective)

#4 #1 and #2 and #3
